# Supplementary material for: 3D Micro/Nanopatterning of a Vinylferrocene Copolymer
Source: MDPI journal article supplement (doi:10.3390/molecules25102438), 2020-05-23
Supplement: s1 [file s1]

## **Supporting Information**

### **3D Micro/Nanopatterning of a Vinylferrocene Copolymer**

Dennis Löber, Subhayan Dey, Burhan Kaban, Fabian Roesler, Martin Maurer, Hartmut Hillmer\* and Rudolf Pietschnig\*

# Table of Contents

|                                                                                                                     |    |
|---------------------------------------------------------------------------------------------------------------------|----|
| <b>Table S1.</b> Determination of vinylferrocene to MMA ratio in VFc-MMA-copolymer MVF .....                        | 3  |
| <b>Fig S1.</b> $^1\text{H}$ and inverse gated $^{13}\text{C}$ NMR NMR of MVF (in Toluene D8, trial 1) .....         | 4  |
| <b>Fig S2.</b> $^1\text{H}$ and inverse gated $^{13}\text{C}$ NMR NMR of MVF (in Toluene D8, trial 2) .....         | 5  |
| <b>Fig S3.</b> $^1\text{H}$ and inverse gated $^{13}\text{C}$ NMR NMR of MVF (in Toluene D8, trial 3) .....         | 6  |
| <b>Fig S4.</b> $^1\text{H}$ and inverse gated $^{13}\text{C}$ NMR NMR of MVF (in Toluene D8, trial 4) .....         | 7  |
| <b>Fig S5.</b> $^1\text{H}$ (top) and inverse gated $^{13}\text{C}$ NMR (bottom) NMR of PMMA (in Toluene D8). ..... | 8  |
| <b>Fig S6.</b> ATR-IR spectrum of MVF.....                                                                          | 9  |
| <b>Fig S7.</b> ATR-IR spectrum of PMMA. ....                                                                        | 10 |

**Table S1.** Determination of vinylferrocene to MMA ratio in VFc-MMA-copolymer MVF

| # Trial of co-polymerization                                       | Trial 1                                                                          | Trial 2 | Trial 3 | Trial 4 |
|--------------------------------------------------------------------|----------------------------------------------------------------------------------|---------|---------|---------|
| Vinylferrocene : MMA (by $^1\text{H}$ NMR)                         | 1 : 3.2                                                                          | 1 : 3.0 | 1 : 2.7 | 1 : 2.8 |
| Avg. Vinylferrocene : MMA (by $^1\text{H}$ NMR)                    | 1 : 2.9(2)                                                                       |         |         |         |
| Vinylferrocene : MMA (by IG $^{13}\text{C}$ NMR) <sup>a</sup>      | 1 : 2.8                                                                          | 1 : 2.8 | 1 : 2.8 | 1 : 2.9 |
| Avg. Vinylferrocene : MMA (by IG $^{13}\text{C}$ NMR) <sup>a</sup> | 1 : 2.8(1)                                                                       |         |         |         |
| Calculated Formula [VFc : MMA = 1 : 2.8] <sup>b</sup>              | $[\text{C}_{12}\text{H}_{12}\text{Fe}]_n[\text{C}_5\text{H}_8\text{O}_2]_{2.8n}$ |         |         |         |
| Calculated % of Carbon                                             | 63.42                                                                            |         |         |         |
| Calculated % of Hydrogen                                           | 7.04                                                                             |         |         |         |
| % of Carbon (exp. found)                                           | 63.39                                                                            | 63.56   | 63.46   | 63.47   |
| % of Hydrogen (exp. found)                                         | 7.10                                                                             | 7.17    | 7.32    | 7.33    |
| Avg. % of Carbon (exp. found)                                      | 63.47(1)                                                                         |         |         |         |
| Avg. % of Hydrogen (exp. found)                                    | 7.23(1)                                                                          |         |         |         |

<sup>a</sup> Inverse gated  $^{13}\text{C}$  NMR has been termed as IG  $^{13}\text{C}$  NMR in this table.

<sup>b</sup> these values refer just to the ratio of the main chain. Upon including termination with butyronitrile and/or hydrogen changes these values in a range which is still in agreement with the proposed composition and block ratio:  $(\text{CH}_3)_2\text{CNC}-[\text{MMA}]_3[\text{VFc}]\text{-H}$ , C%: 64.03, H%: 7.45;  $(\text{CH}_3)_2\text{CNC}-[\text{MMA}]_9[\text{VFc}]_3\text{-H}$ , C%: 63.56, H%: 7.22;  $(\text{CH}_3)_2\text{CNC}-[\text{MMA}]_{15}[\text{VFc}]_5\text{-H}$ , C%: 63.45, H%: 7.16;  $(\text{CH}_3)_2\text{CNC}-[\text{MMA}]_{60}[\text{VFc}]_{20}\text{-H}$ , C%: 63.33, H%: 7.10. N.B.: the IR spectra of MVF (Fig. S6) indicate only marginal bands in the region characteristic for alkyl nitriles (2250 to 2230  $\text{cm}^{-1}$ ).

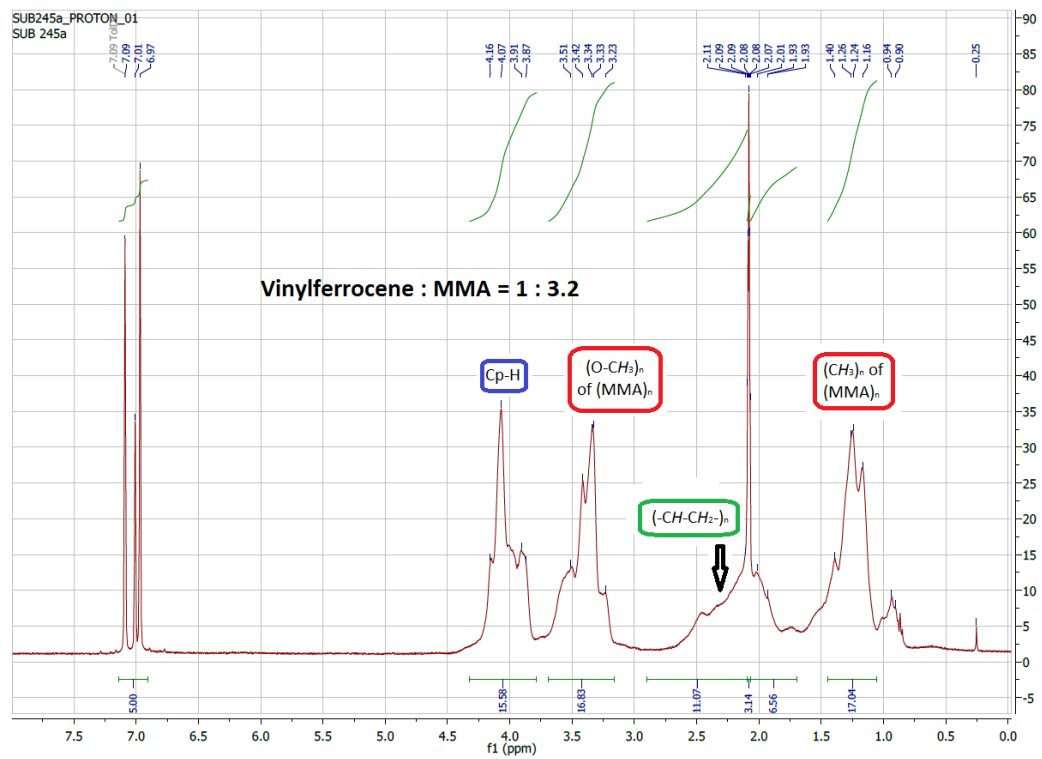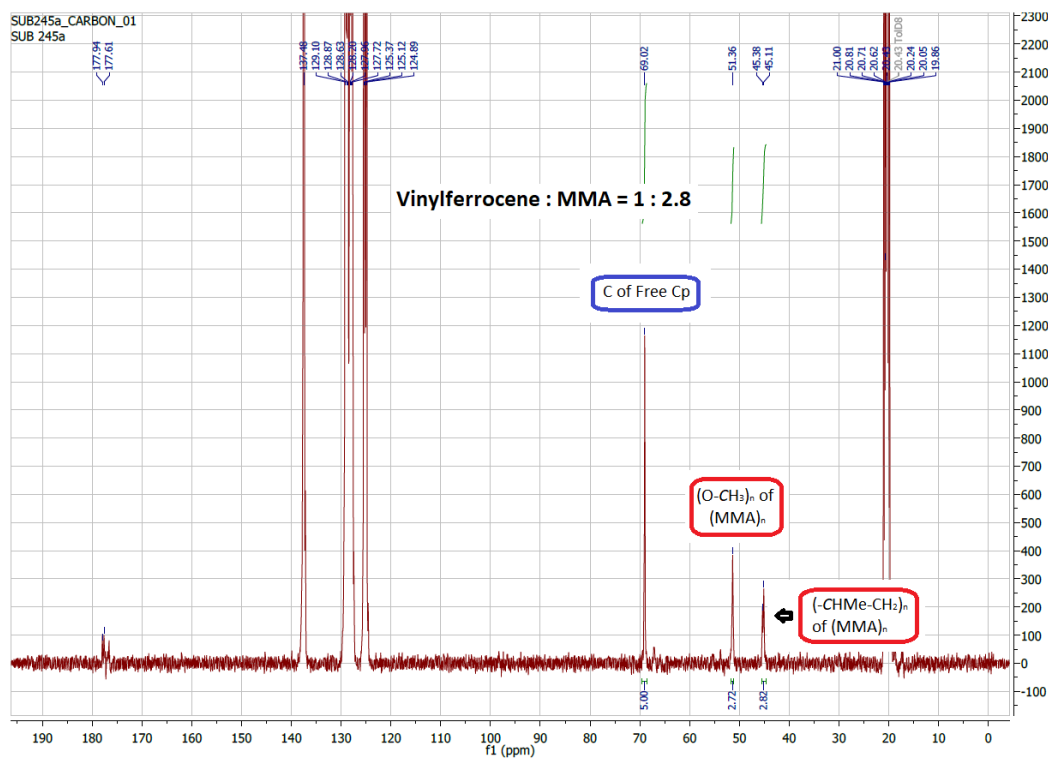

**Fig S1.**  $^1\text{H}$  (top) and inverse gated  $^{13}\text{C}$  NMR (bottom) NMR of MVF (in Toluene  $\text{D}_8$ ), obtained in trial 1. [Chemical Analysis: Calculated C, 63.37; H, 7.06. Found C, 63.39; H, 7.10.]

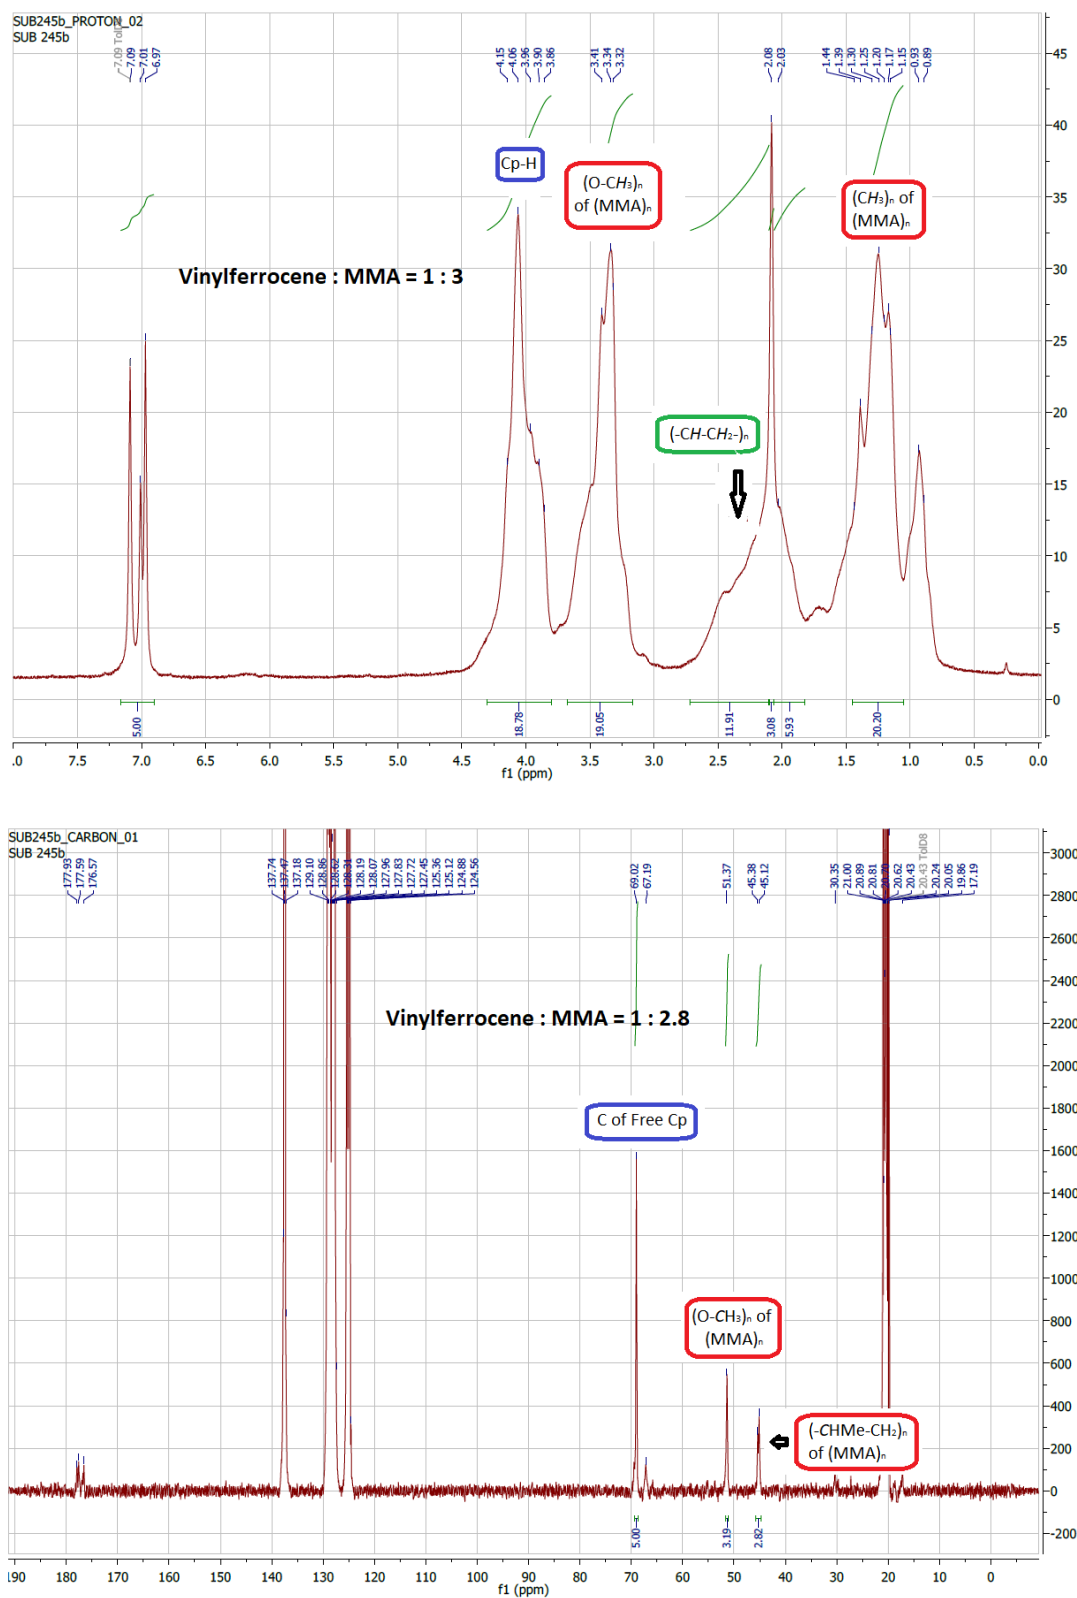

**Fig S2.** <sup>1</sup>H (top) and inverse gated <sup>13</sup>C NMR (bottom) NMR of MVF (in Toluene D<sub>8</sub>), obtained in trial 2. [Chemical Analysis: Calculated C, 63.37; H, 7.06. Found C, 63.56; H, 7.17.]

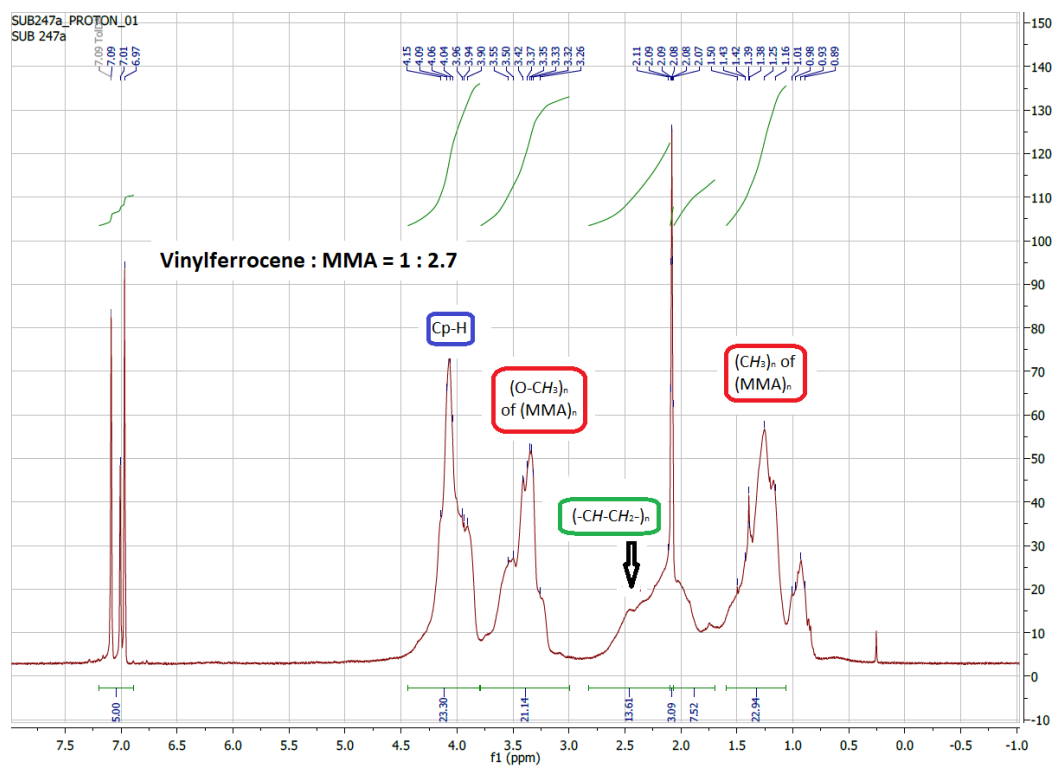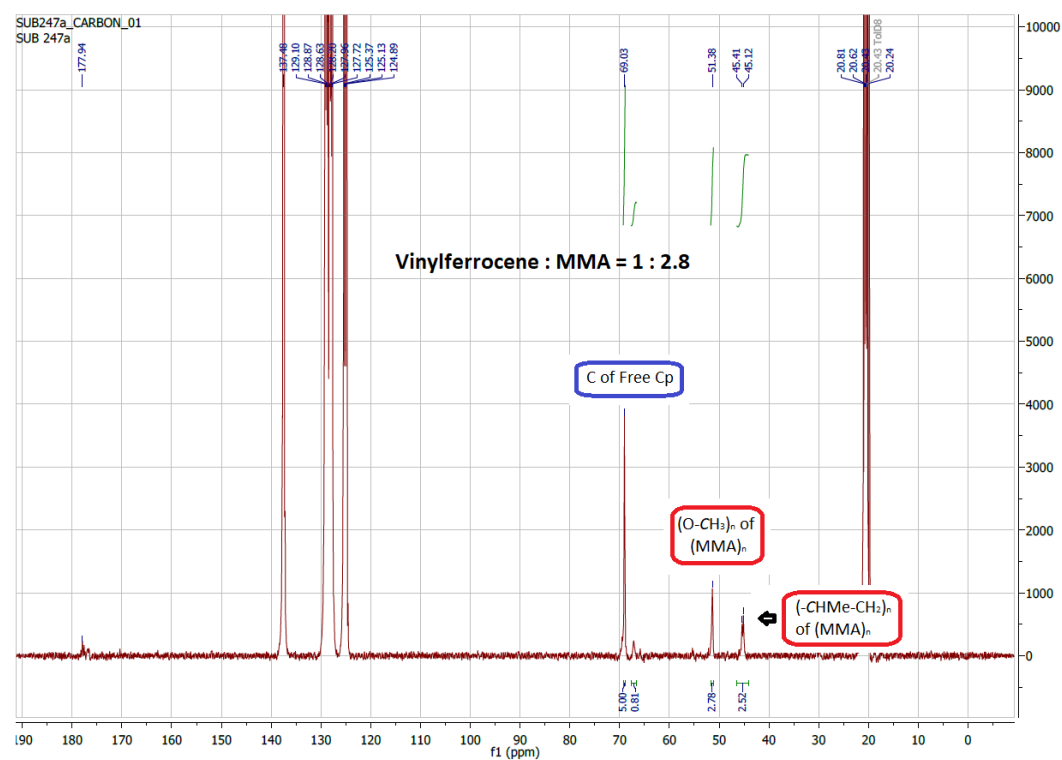

**Fig S3.**  $^1\text{H}$  (top) and inverse gated  $^{13}\text{C}$  NMR (bottom) NMR of MVF (in Toluene D<sub>8</sub>), obtained in trial 3. [Chemical Analysis: Calculated C, 63.37; H, 7.06. Found C, 63.46; H, 7.32.]

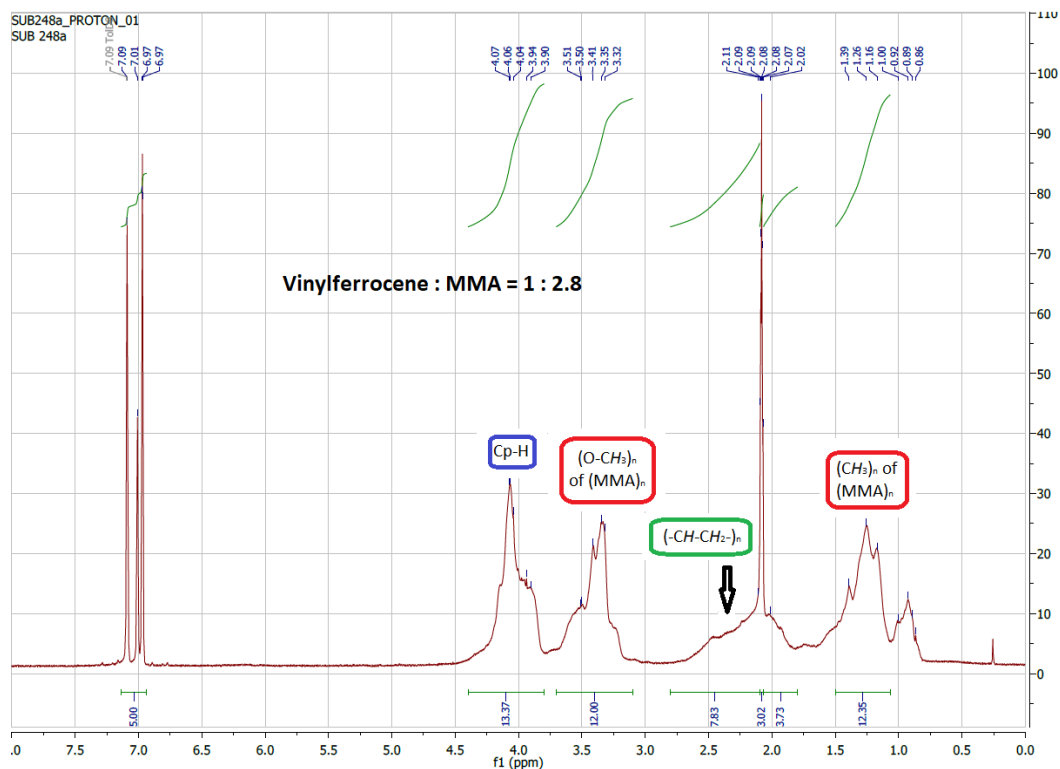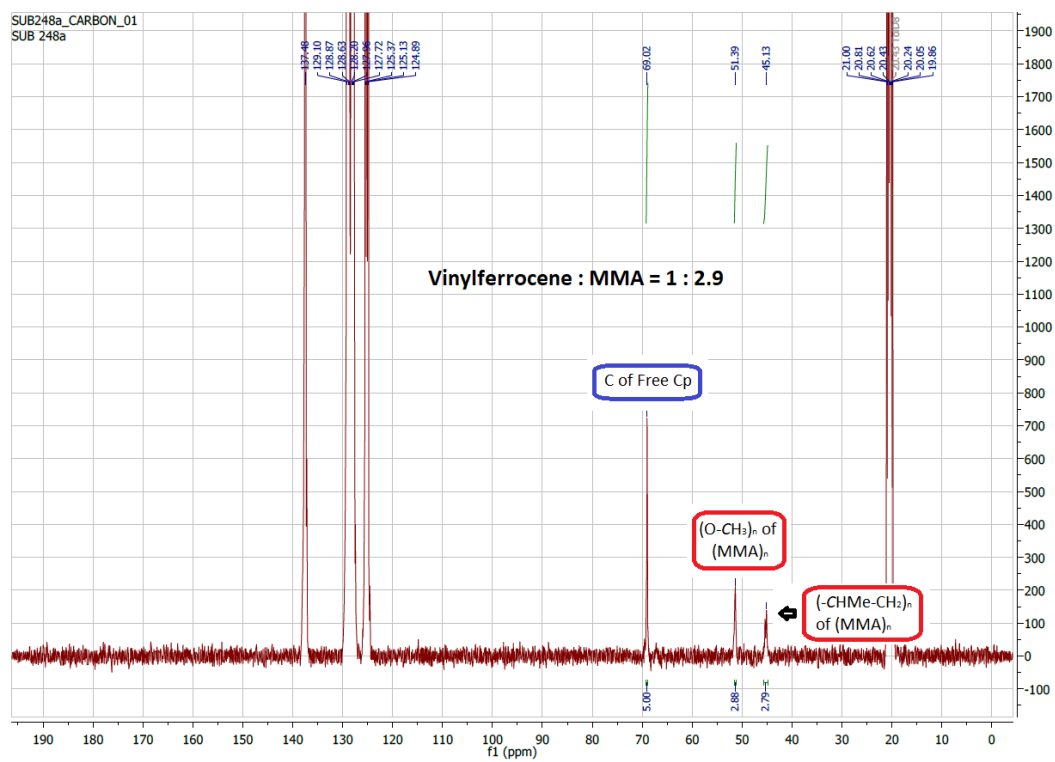

**Fig S4.** <sup>1</sup>H (top) and inverse gated <sup>13</sup>C NMR (bottom) NMR of MVF (in Toluene D<sub>8</sub>), obtained in trial 4. [Chemical Analysis: Calculated C, 63.37; H, 7.06. Found C, 63.47; H, 7.33.]

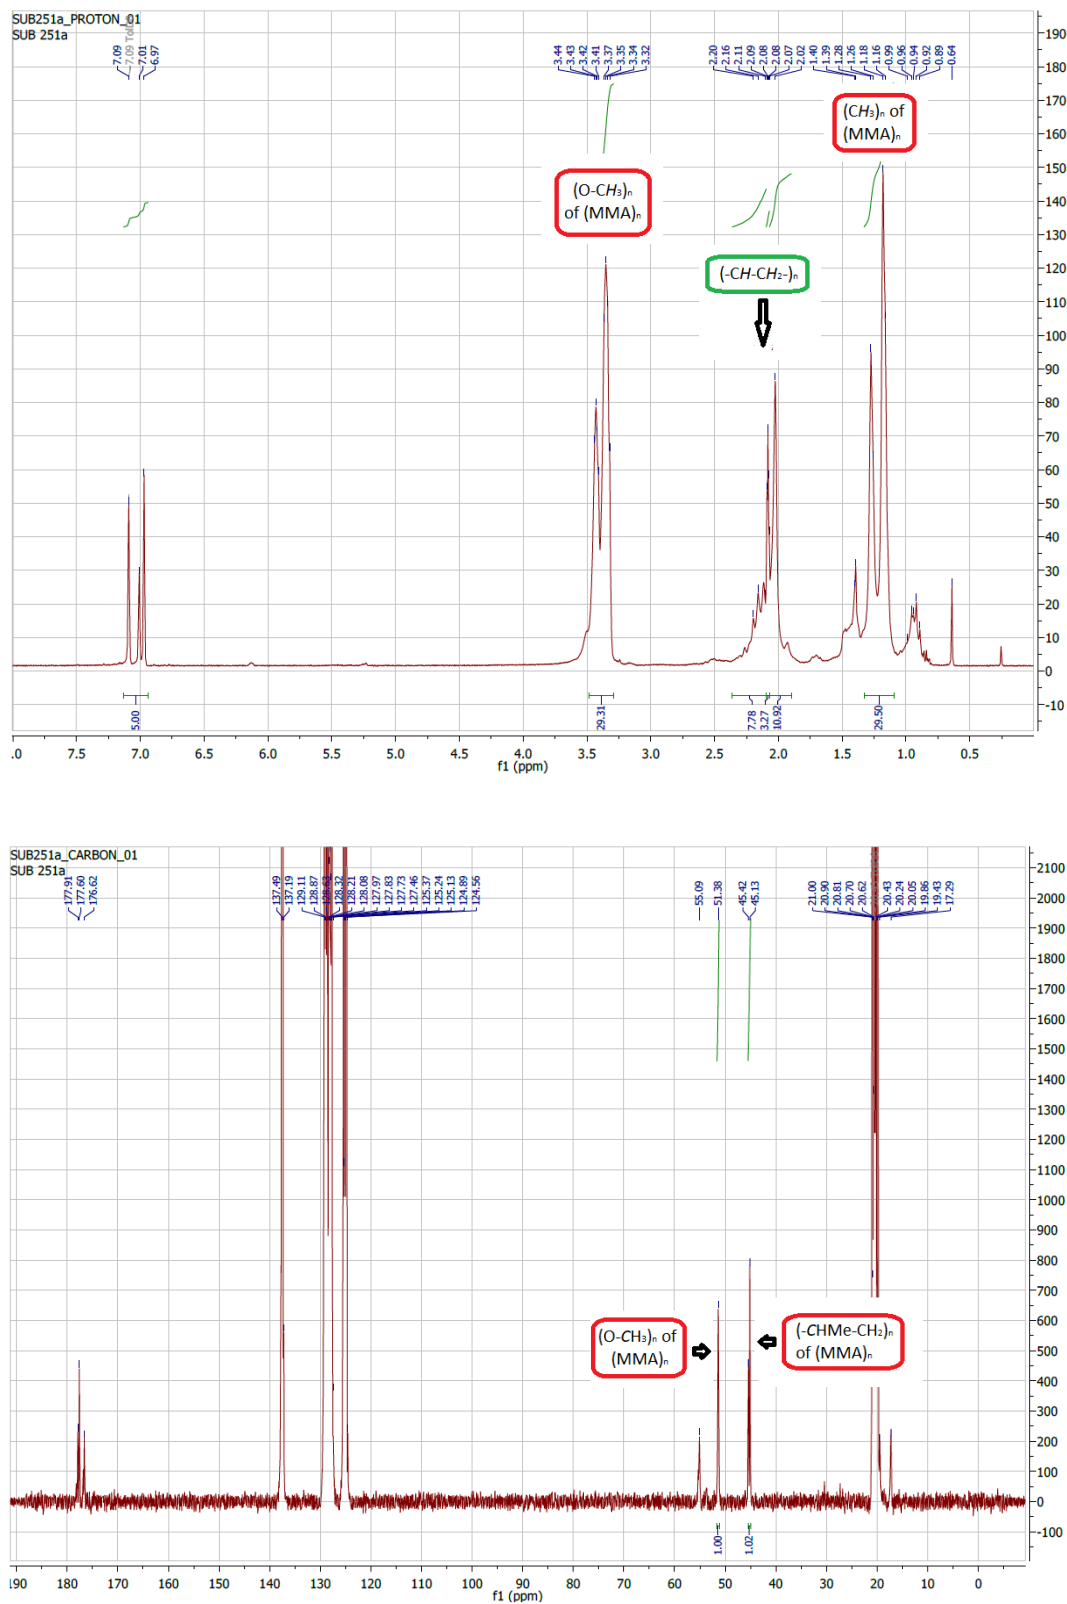

**Fig S5.**  $^1\text{H}$  (top) and inverse gated  $^{13}\text{C}$  NMR (bottom) NMR of PMMA (in Toluene D8).



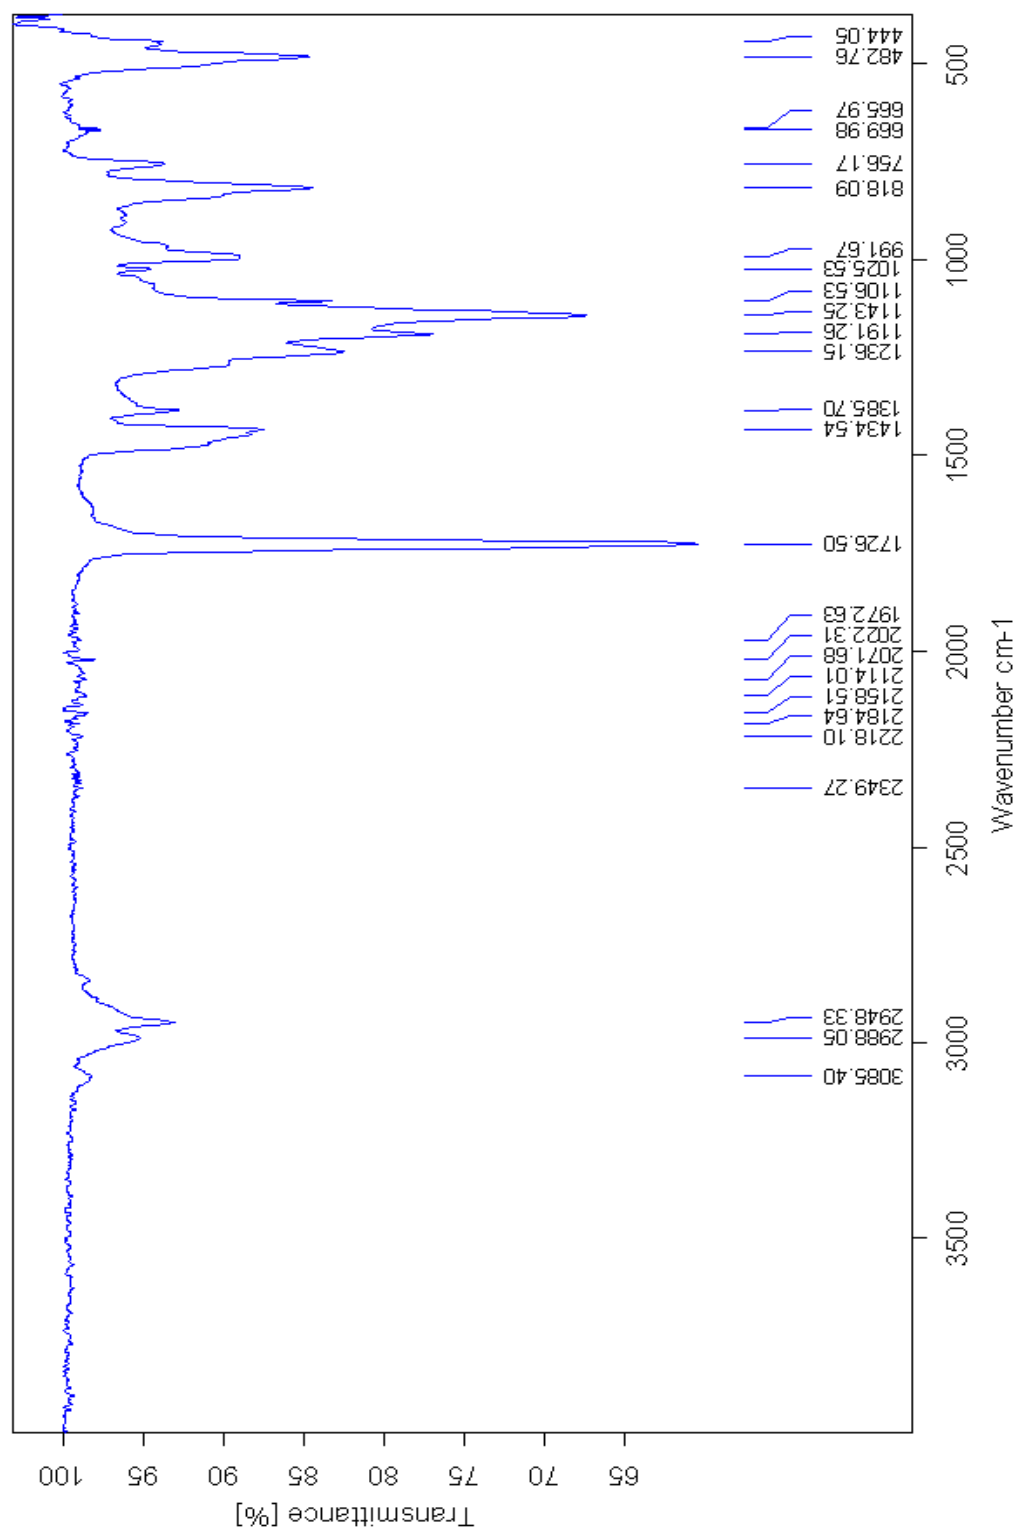

**Fig S6.** ATR-IR spectrum of MVF.

|                                 |     |                                    |            |
|---------------------------------|-----|------------------------------------|------------|
| C:\Programme\OPUS_65\MEAS\MVF.0 | MVF | Instrument type and / or accessory | 24/04/2020 |
|---------------------------------|-----|------------------------------------|------------|

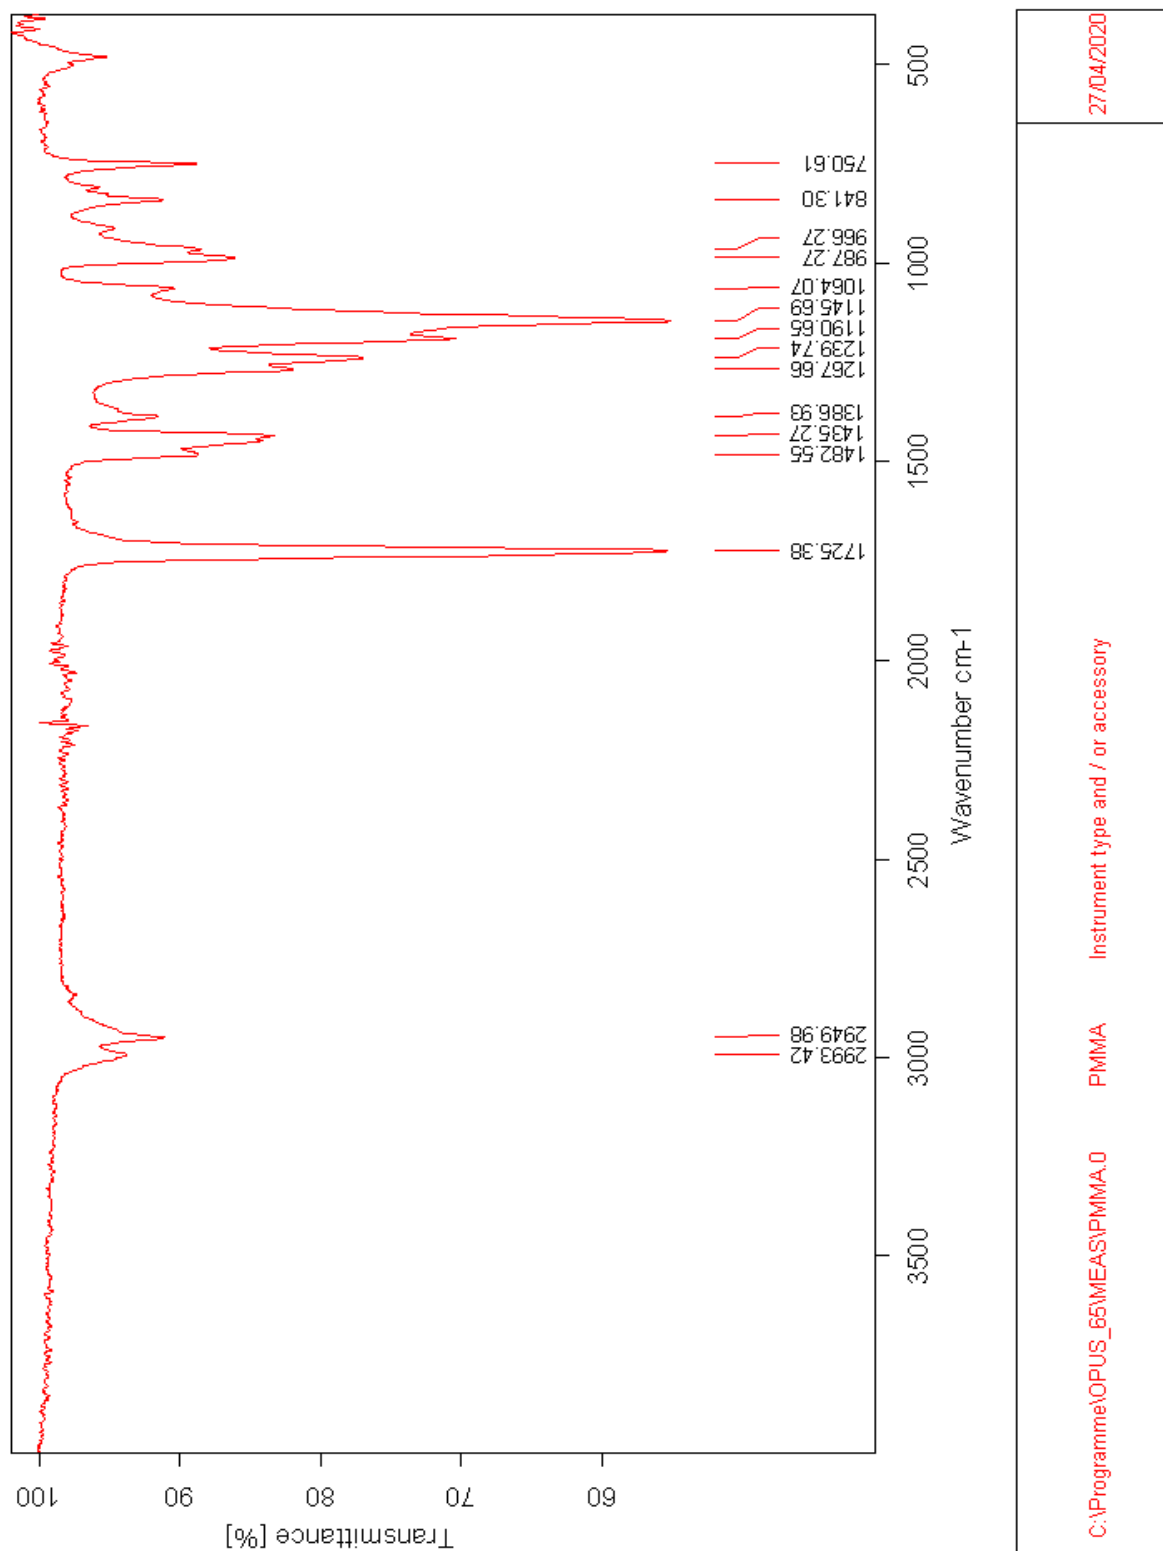

**Fig S7.** ATR-IR spectrum of PMMA.
